# Supplementary material for: Pirfenidone-loaded exosomes derived from pancreatic ductal adenocarcinoma cells alleviate fibrosis of premetastatic niches to inhibit liver metastasis
Source: Royal Society of Chemistry journal article supplement (doi:10.1039/d2bm00770c), 2022-01-01
Supplement: d2bm00770c1.pdf [file d2bm00770c1.pdf]

## Supporting Information

### **Pirfenidone-Loaded Exosomes Derived from Pancreatic Ductal Adenocarcinoma Cells Alleviate Fibrosis of the Premetastatic Niche to Inhibit Liver Metastasis**

*Jing Zhao, # Yun Zhu, # Zhuojin Li, # Jiawei Liang, Yin Zhang, Siqu Zhou, Yixuan Zhang, Zhiwen Fan, Yonghua Shen, Yifeng Liu, Feng Zhang, Shanshan Shen, Guifang Xu, Lei Wang, Ying Lv, \* Shu Zhang, \* Xiaoping Zou \**

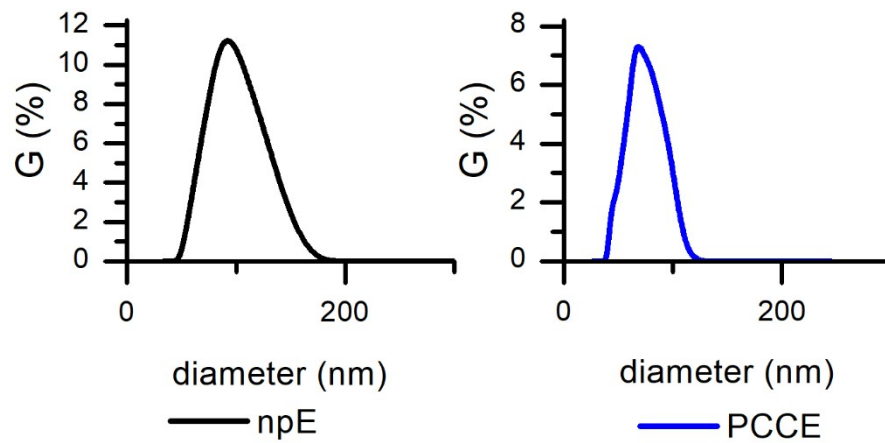

**Figure S1. DLS characterization of exosomes.** Dynamic light scattering (DLS) measurements of exosomes isolated from supernatant and plasma.

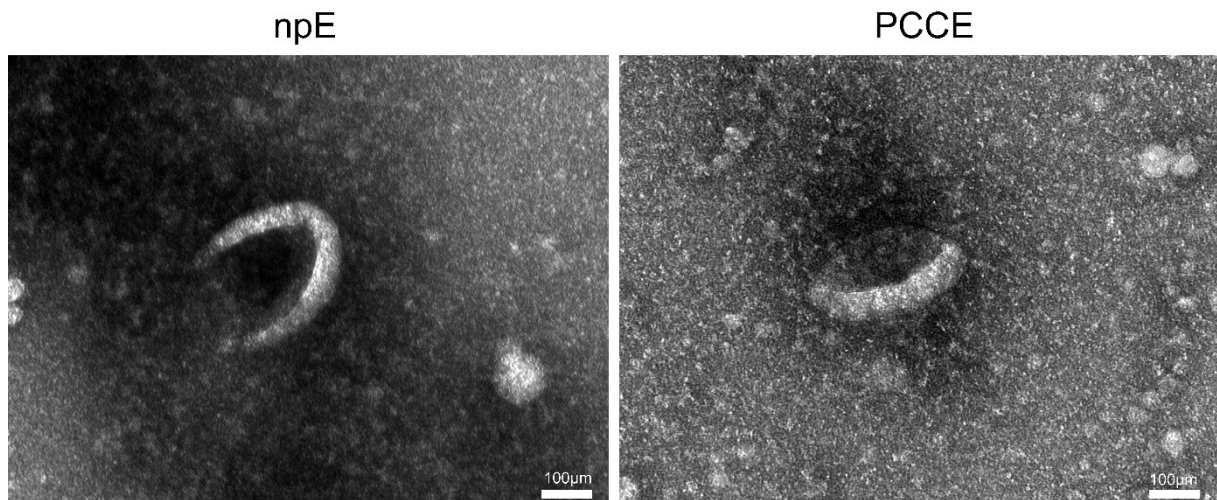

**Figure S2. TEM characterization of exosomes.** Transmission electron microscopy (TEM) analysis of exosomes isolated from supernatant and plasma.

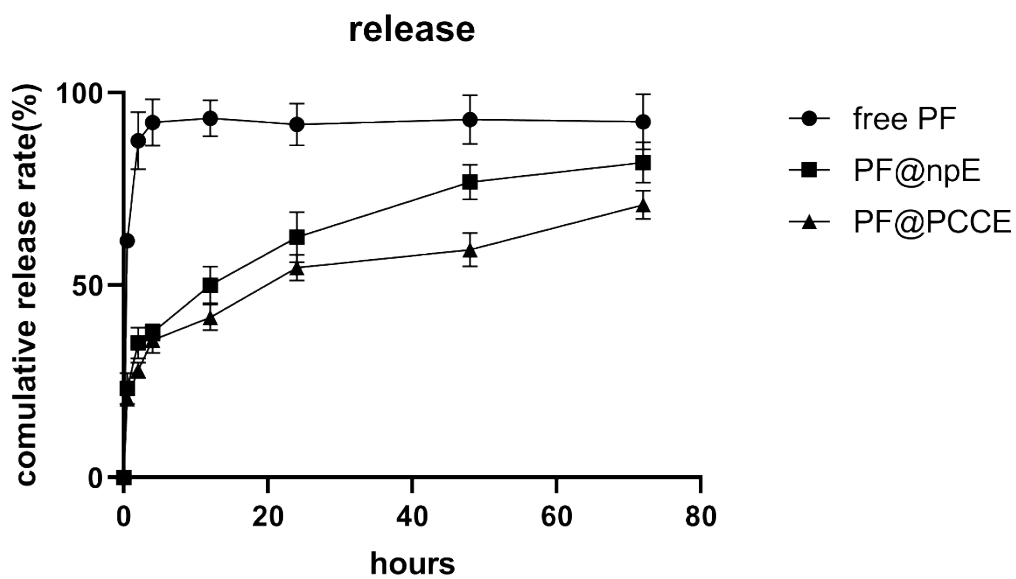

**Figure S3. Release test of free PF, PF@npE and PF@PCCE.** The concentration ratio of free drug to total drug in the 3 systems over 72 h.

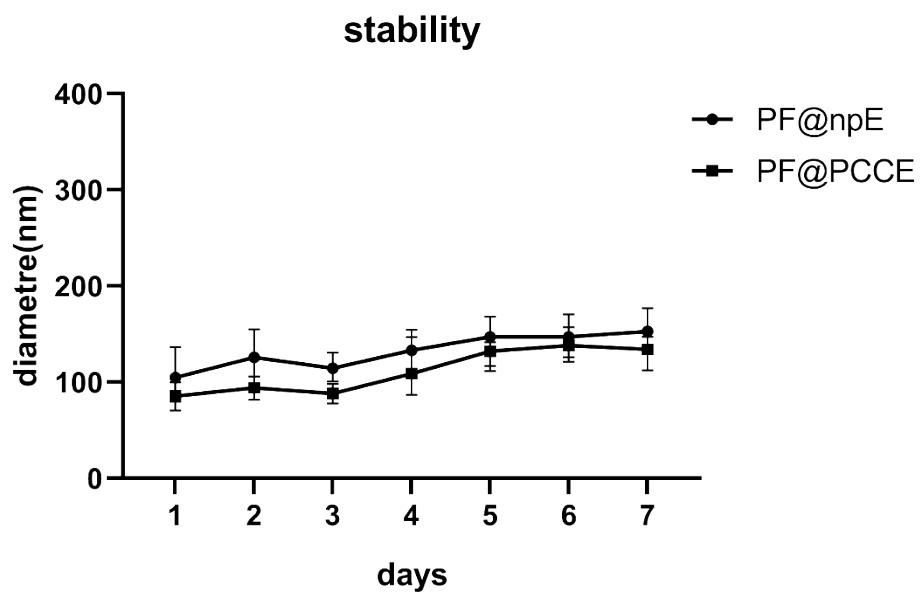

**Figure S4. Stability test of PF@npE and PF@PCCE.** Diametre change of two types of exosome vehicles over 1 week examined by DLS.

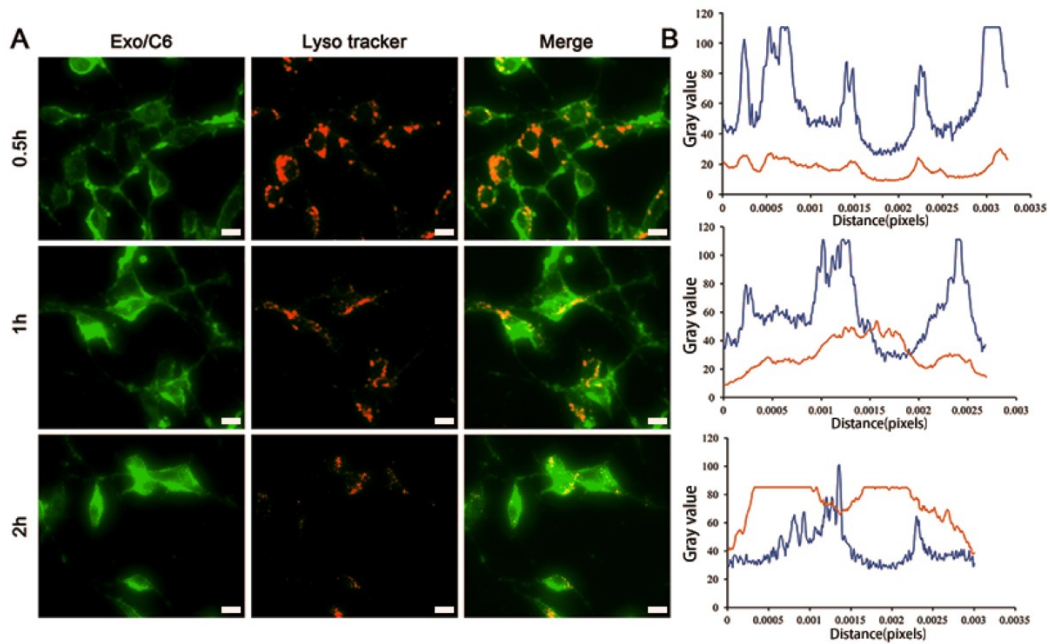

**Figure S5. Evaluation of endosomal escape capacity of PCCE on HSC cells.**

Endosome/lysosome in HSC was stained by LysoTracker red. The bar is 20  $\mu\text{m}$ . B) Line-scan profiles of PCCE and LysoTracker red after 0.5h, 1 h, and 2h of incubation. The level of the overlapped blue line and orange line is negatively correlated to endosomal escape of PCCE.

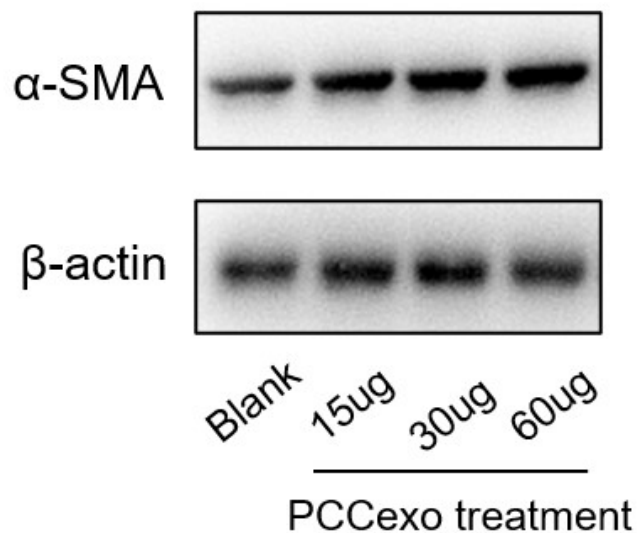

**Figure S6. Lx2 activation induced by exosomes derived from pancreatic cancer cells.**

Western blot of  $\alpha$ -SMA of Lx2 treated by exosomes derived from pancreatic cells.

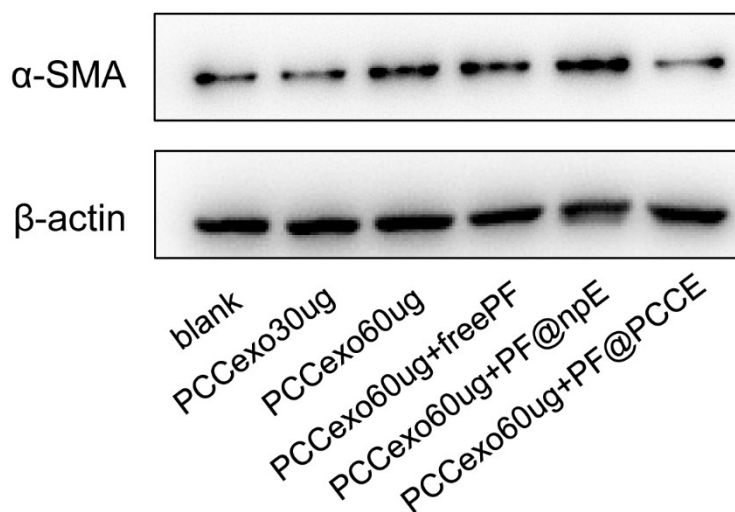

**Figure S7. Anti-fibrotic effects of PF@PCCE on Lx2.** Western blot of  $\alpha$ -SMA of Lx2 treated by exosomes derived from pancreatic cells and PF with different loading vehicles.

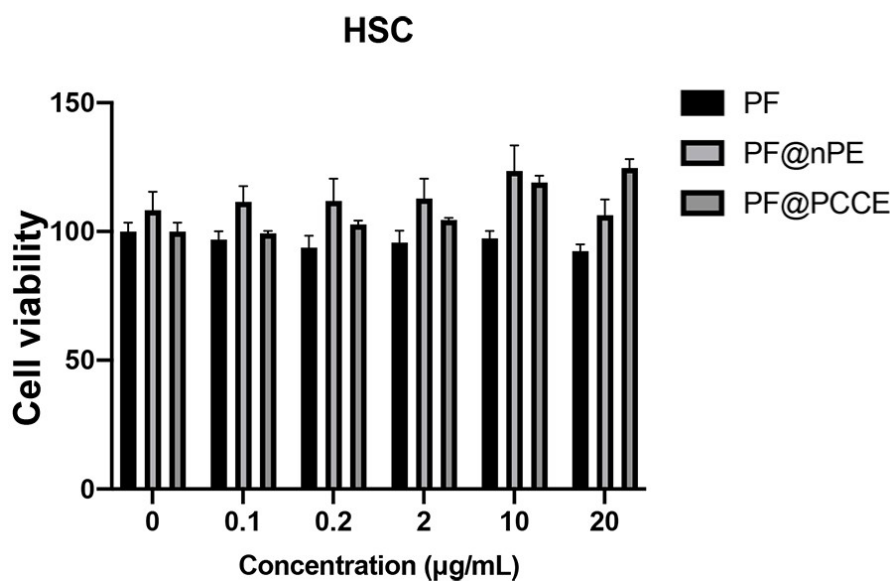

**Figure S8. Cell viability of Lx2 after treated by PF, PF@npE, and PF@PCCE.** CCK8 test for the evaluation of proliferation of HSC treated by PF, PF@npE, PF@PCCE at different concentration for 48h.

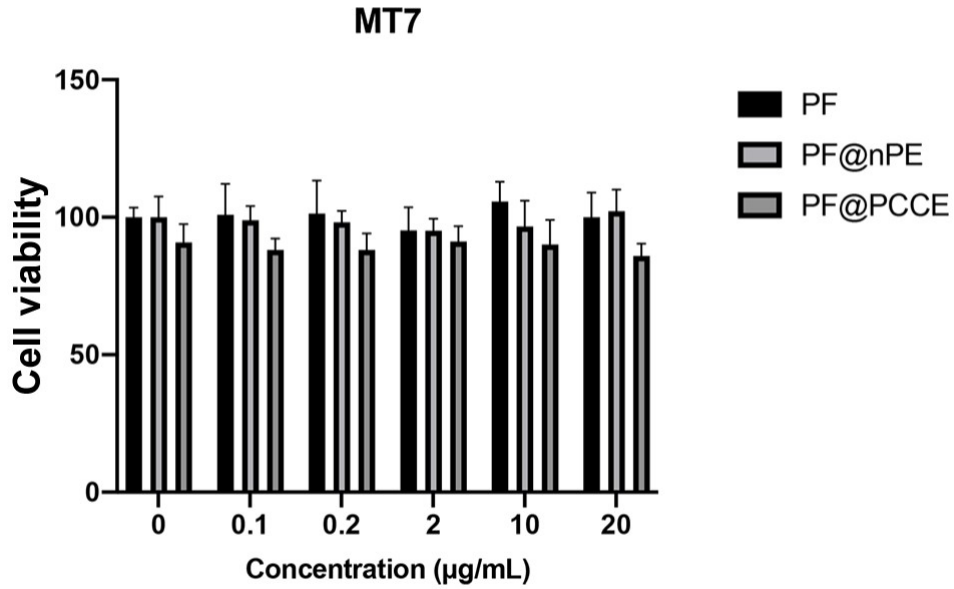

**Figure S9.** Cell viability of mT7 after treated by PF, PF@npE, and PF@PCCE. CCK8 test for the evaluation of proliferation of mT7 treated by PF, PF@npE, PF@PCCE at different concentration for 48h.

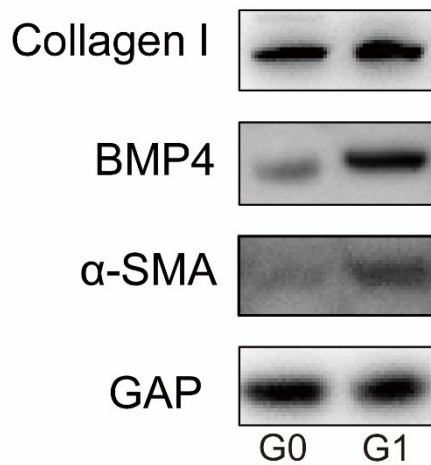

**Figure S10.** Western blot results of G0 and G1. The expression of Collagen I, BMP4 and α-SMA in the liver of G0 and G1 groups.

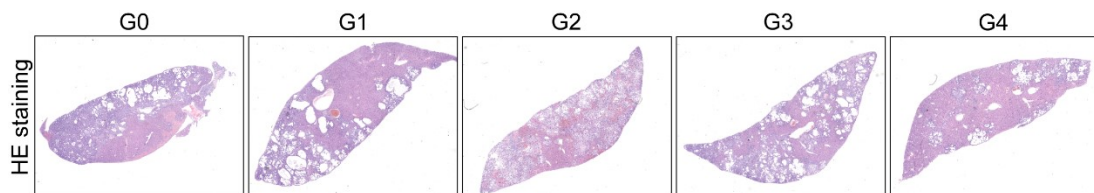

**Figure S11.** Representative full scan of liver metastasis.

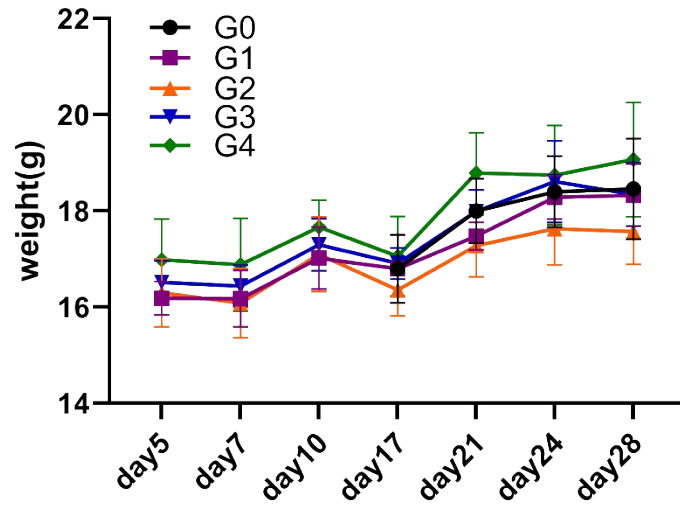

Figure S12. The body weight of mice throughout the study.

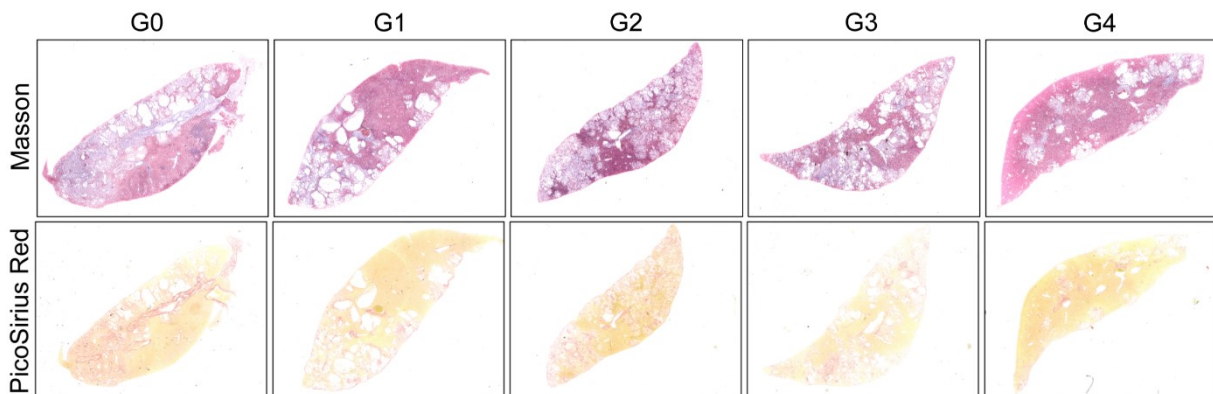

Figure S13. Representative full scan of Masson and picosirius red staining.

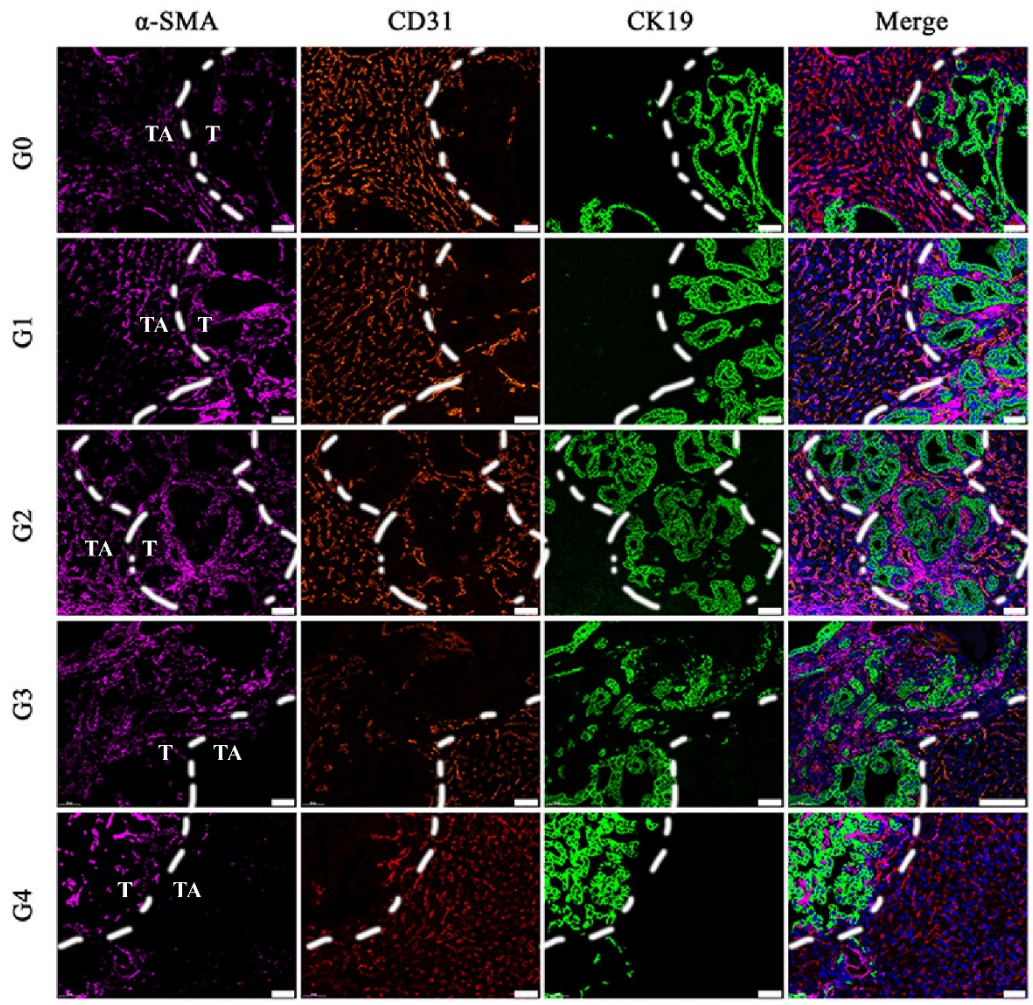

**Figure S14. Immunofluorescence staining of mice liver tissues.** Green, CK19; pink,  $\alpha$ -SMA; blue, DAPI; red, CD31. Dotted lines mark the borders between tumor (T) and tumor adjacent (TA) areas.
